# Supplementary material for: Core Synergies Measured with Ultrasound in Subjects with Chronic Non-Specific Low Back Pain and Healthy Subjects: A Systematic Review
Source: Sensors (Basel). 2022 Nov 10;22(22):8684. doi: 10.3390/s22228684 (PMC9692478; doi:10.3390/s22228684)
Supplement: Supplementary file 1 [file sensors-22-08684-s001.zip › sensors-1953483-supplementary.pdf]

## Supplementary

### Section S1. Search Strategy

Table S1. Search Strategy.

|                                                                                                                                                                                                                                                                                                                                                                                                                                                                                                  |                                                                                                                                        |      |             |
|--------------------------------------------------------------------------------------------------------------------------------------------------------------------------------------------------------------------------------------------------------------------------------------------------------------------------------------------------------------------------------------------------------------------------------------------------------------------------------------------------|----------------------------------------------------------------------------------------------------------------------------------------|------|-------------|
| Project/Study                                                                                                                                                                                                                                                                                                                                                                                                                                                                                    | CORE synergies measured with ultrasound in subjects with chronic non-specific low back pain and healthy subjects. A systematic review. |      |             |
| Subproject                                                                                                                                                                                                                                                                                                                                                                                                                                                                                       | -                                                                                                                                      |      |             |
| Requested by                                                                                                                                                                                                                                                                                                                                                                                                                                                                                     | María Cervera Cano                                                                                                                     | Date | 29/Jun/2021 |
| PICO format with specific terms                                                                                                                                                                                                                                                                                                                                                                                                                                                                  |                                                                                                                                        |      |             |
| DESCRIPTION                                                                                                                                                                                                                                                                                                                                                                                                                                                                                      | SCOPE                                                                                                                                  |      |             |
| Population                                                                                                                                                                                                                                                                                                                                                                                                                                                                                       | Healthy subjects and subjects with crhonic nonspecific low back pain                                                                   |      |             |
| Intervention                                                                                                                                                                                                                                                                                                                                                                                                                                                                                     | Ultrasound (M mode, B mode)                                                                                                            |      |             |
| Comparator                                                                                                                                                                                                                                                                                                                                                                                                                                                                                       | -                                                                                                                                      |      |             |
| Outcomes                                                                                                                                                                                                                                                                                                                                                                                                                                                                                         | Muscle synergies (coactivation, activation sequence, activation order, co-contraction, cross-sectional area, muscle thickness)         |      |             |
| Search Filters                                                                                                                                                                                                                                                                                                                                                                                                                                                                                   |                                                                                                                                        |      |             |
| Time period                                                                                                                                                                                                                                                                                                                                                                                                                                                                                      | 2005-present                                                                                                                           |      |             |
| Aged                                                                                                                                                                                                                                                                                                                                                                                                                                                                                             | 18-60 years old                                                                                                                        |      |             |
| TyEO of study                                                                                                                                                                                                                                                                                                                                                                                                                                                                                    | Randomised Controlled Studies, Observational Studies, Systematic Reviews and Meta-Analyses                                             |      |             |
| Languages                                                                                                                                                                                                                                                                                                                                                                                                                                                                                        | English and Spanish                                                                                                                    |      |             |
| Others                                                                                                                                                                                                                                                                                                                                                                                                                                                                                           | Studies measuring muscle synergies with EMG or MRI will be excluded from the search.                                                   |      |             |
| Search terms (by having been used in similar searches or by literature review)                                                                                                                                                                                                                                                                                                                                                                                                                   |                                                                                                                                        |      |             |
| P – nonspecific low back pain, low back pain, nonspecific low back pain,<br>I – ultrasound, rehabilitative ultrasound, rehabilitative ultrasound imaging (RUSI), ultrasound m mode, ultrasound b mode<br>O – Sinergysm, co contraction, co-activation, thickness, cross sectional area, relation, relationship<br><b>abdominal muscles</b> , external oblique, internal oblique, rectus abdominis pelvic floor, abdominal wall, transversus abdominis, multifidus, lumbar multifidus, diaphragm. |                                                                                                                                        |      |             |
| Databases consulted                                                                                                                                                                                                                                                                                                                                                                                                                                                                              |                                                                                                                                        |      |             |
| Medline, PEDro, WOS                                                                                                                                                                                                                                                                                                                                                                                                                                                                              |                                                                                                                                        |      |             |
|                                                                                                                                                                                                                                                                                                                                                                                                                                                                                                  |                                                                                                                                        |      |             |
| Databases used, strategies and results                                                                                                                                                                                                                                                                                                                                                                                                                                                           |                                                                                                                                        |      |             |
| Database - 1                                                                                                                                                                                                                                                                                                                                                                                                                                                                                     |                                                                                                                                        |      |             |
| Database name                                                                                                                                                                                                                                                                                                                                                                                                                                                                                    | MEDLINE Ovid                                                                                                                           |      |             |
| Search date                                                                                                                                                                                                                                                                                                                                                                                                                                                                                      | 05/Jul/2021                                                                                                                            |      |             |
| Strategy                                                                                                                                                                                                                                                                                                                                                                                                                                                                                         | Ovid MEDLINE(R) ALL / PubMed(R) <1946 to Present>                                                                                      |      |             |

|      |                                                                                           |                                                                                                                                                                                                                                                              |         |
|------|-------------------------------------------------------------------------------------------|--------------------------------------------------------------------------------------------------------------------------------------------------------------------------------------------------------------------------------------------------------------|---------|
|      | 1                                                                                         | Low Back Pain/                                                                                                                                                                                                                                               | 23367   |
|      | 2                                                                                         | low\$2 back pain*.kw,tw.                                                                                                                                                                                                                                     | 31490   |
|      | 3                                                                                         | low\$2 back ache* .kw,tw.                                                                                                                                                                                                                                    | 55      |
|      | 4                                                                                         | low\$2 backache* .kw,tw.                                                                                                                                                                                                                                     | 285     |
|      | 5                                                                                         | LBP.kw,tw.                                                                                                                                                                                                                                                   | 8865    |
|      | 6                                                                                         | lumbopelvic pain.kw,tw.                                                                                                                                                                                                                                      | 122     |
|      | 7                                                                                         | (lumbalgia or lumbago).kw,tw.                                                                                                                                                                                                                                | 1596    |
|      | 8                                                                                         | or/1-7                                                                                                                                                                                                                                                       | 42336   |
|      | 9                                                                                         | Ultrasonography/                                                                                                                                                                                                                                             | 187054  |
|      | 10                                                                                        | (ultrasonograph* or ultrasound* or ultrasonic or sonograph* or echograph* or echotomograph*).kw,tw.                                                                                                                                                          | 432051  |
|      | 11                                                                                        | or/9-10                                                                                                                                                                                                                                                      | 491021  |
|      | 12                                                                                        | exp Abdominal Muscles/                                                                                                                                                                                                                                       | 19634   |
|      | 13                                                                                        | Abdominal Wall/                                                                                                                                                                                                                                              | 6847    |
|      | 14                                                                                        | ((abdominal or cremaster or pyramidalis) and muscl*).kw,tw.                                                                                                                                                                                                  | 18840   |
|      | 15                                                                                        | ((quadratus or transvers* or rectus or recti) and abdomin*).kw,tw.                                                                                                                                                                                           | 13756   |
|      | 16                                                                                        | abdominopelvic muscle*.kw,tw.                                                                                                                                                                                                                                | 2       |
|      | 17                                                                                        | (obliqu* adj (intern* or extern*)).kw,tw.                                                                                                                                                                                                                    | 439     |
|      | 18                                                                                        | (pelvic and (diaphragm* or floor)).kw,tw.                                                                                                                                                                                                                    | 11107   |
|      | 19                                                                                        | 'abdominal wall'.kw,tw.                                                                                                                                                                                                                                      | 20431   |
|      | 20                                                                                        | 'lumbar multifidus'.kw,tw.                                                                                                                                                                                                                                   | 483     |
|      | 21                                                                                        | or/12-20                                                                                                                                                                                                                                                     | 66788   |
|      | 22                                                                                        | Synergis\$4.kw,tw.                                                                                                                                                                                                                                           | 114665  |
|      | 23                                                                                        | relation\$5.kw,tw.                                                                                                                                                                                                                                           | 1907221 |
|      | 24                                                                                        | Muscle Contraction/                                                                                                                                                                                                                                          | 97299   |
|      | 25                                                                                        | ('co-contraction\$1' or cocontraction\$1 or contraction*).kw,tw.                                                                                                                                                                                             | 152542  |
|      | 26                                                                                        | ('co-activit*' or coactivit* or 'co-activation\$1' or coactivation\$1).kw,tw.                                                                                                                                                                                | 5023    |
|      | 27                                                                                        | Thickness.kw,tw.                                                                                                                                                                                                                                             | 239993  |
|      | 28                                                                                        | or/22-27                                                                                                                                                                                                                                                     | 2417169 |
|      | 29                                                                                        | 21 and 28                                                                                                                                                                                                                                                    | 9796    |
|      | 30                                                                                        | 8 and 11 and 29                                                                                                                                                                                                                                              | 250     |
|      | 31                                                                                        | limit 30 to (yr="2005 -Current" and ("young adult (19 to 24 years)" or "adult (19 to 44 years)" or "middle age (45 to 64 years)") and (english or spanish) and (meta analysis or observational study or randomized controlled trial or "systematic review")) | 41      |
| File | 2021.07.05 - Sinergias CORE_MEDLINE_41.docx<br>2021.07.05 - Sinergias CORE_MEDLINE_41.ris |                                                                                                                                                                                                                                                              |         |

## Database - 2

|               |                                     |                                                                                                                                                                                   |         |
|---------------|-------------------------------------|-----------------------------------------------------------------------------------------------------------------------------------------------------------------------------------|---------|
| Database name | EMBASE                              |                                                                                                                                                                                   |         |
| Search date   | 06/jul/2021                         |                                                                                                                                                                                   |         |
| Strategy      | Embase Session Results (6 Jul 2021) |                                                                                                                                                                                   |         |
|               | No.                                 | Query                                                                                                                                                                             | Results |
|               | #30                                 | #29 AND ('meta analysis'/de OR 'observational study'/de OR 'randomized controlled trial'/de OR 'systematic review'/de) AND ('article'/it OR 'article in press'/it OR 'review'/it) | 50      |
|               | #29                                 | #8 AND #11 AND #27 AND ([english]/lim OR [spanish]/lim) AND [adult]/lim AND [2005-2021]/py                                                                                        | 213     |
|               | #28                                 | #8 AND #11 AND #27                                                                                                                                                                | 288     |
|               | #27                                 | #19 AND #26                                                                                                                                                                       | 12584   |
|               | #26                                 | #20 OR #21 OR #22 OR #23 OR #24 OR #25                                                                                                                                            | 3051734 |
|               | #25                                 | thickness:ti,ab,kw                                                                                                                                                                | 313884  |
|               | #24                                 | 'co-activit*:ti,ab,kw OR coactivit*:ti,ab,kw OR 'co-activation\$:ti,ab,kw OR coactivation\$:ti,ab,kw                                                                              | 6054    |
|               | #23                                 | 'co-contraction\$:ti,ab,kw OR cocontraction\$:ti,ab,kw OR contraction*:ti,ab,kw                                                                                                   | 195043  |
|               | #22                                 | 'muscle contraction'/de                                                                                                                                                           | 75656   |
|               | #21                                 | relation\$:ti,ab,kw OR relationship\$:ti,ab,kw                                                                                                                                    | 2395076 |
|               | #20                                 | synergis*:ti,ab,kw                                                                                                                                                                | 174745  |
|               | #19                                 | #12 OR #13 OR #14 OR #15 OR #16 OR #17 OR #18                                                                                                                                     | 79960   |
|               | #18                                 | 'lumbar multifidus':ti,ab,kw                                                                                                                                                      | 523     |
|               | #17                                 | 'abdominal wall':ti,ab,kw                                                                                                                                                         | 29121   |
|               | #16                                 | (pelvic NEAR/5 (diaphragm* OR floor)):ti,ab,kw                                                                                                                                    | 19954   |
|               | #15                                 | (obliqu* NEAR/5 (intern* OR extern*)):ti,ab,kw                                                                                                                                    | 3151    |
|               | #14                                 | (quadratus:ti,ab,kw OR transvers*:ti,ab,kw OR rectus:ti,ab,kw OR recti:ti,ab,kw) AND abdomin*:ti,ab,kw                                                                            | 19920   |
|               | #13                                 | ((abdom* OR cremaster OR pyramidalis) NEAR/5 muscl*):ti,ab,kw                                                                                                                     | 14441   |
|               | #12                                 | 'abdominal wall musculature'/exp                                                                                                                                                  | 16336   |
|               | #11                                 | #9 OR #10                                                                                                                                                                         | 1183959 |
|               | #10                                 | ultrasonograph*:ti,ab,kw OR ultrasound*:ti,ab,kw OR ultrasonic:ti,ab,kw OR sonograph*:ti,ab,kw OR echograph*:ti,ab,kw OR echotomograph*:ti,ab,kw                                  | 641065  |
|               | #9                                  | 'echography'/exp                                                                                                                                                                  | 893162  |
|               | #8                                  | #1 OR #2 OR #3 OR #4 OR #5 OR #6 OR #7                                                                                                                                            | 75771   |
|               | #7                                  | lumbalgia:ti,ab,kw OR lumbago:ti,ab,kw                                                                                                                                            | 2252    |
|               | #6                                  | 'lumbopelvic pain':ti,ab,kw                                                                                                                                                       | 140     |
|               | #5                                  | lbp:ti,ab,kw                                                                                                                                                                      | 11628   |
|               | #4                                  | 'low* backache*':ti,ab,kw                                                                                                                                                         | 382     |
|               | #3                                  | 'low* back ache*':ti,ab,kw                                                                                                                                                        | 138     |

|               |                                                                                         |                                             |       |
|---------------|-----------------------------------------------------------------------------------------|---------------------------------------------|-------|
|               | #2                                                                                      | 'low* back pain*':ti,ab,kw                  | 44677 |
|               | #1                                                                                      | 'low back pain'/exp                         | 61989 |
| File          | 2021.07.06 - Sinergias CORE_EMBASE_50.docx<br>2021.07.06 - Sinergias CORE_EMBASE_50.ris |                                             |       |
| DATABASE - 3  |                                                                                         |                                             |       |
| Database name | PEDro                                                                                   |                                             |       |
| Search date   | 06/jul/2021                                                                             |                                             |       |
| Strategy      | Abstract & Title                                                                        | "low back pain" ultraso* abdomin* musc*     |       |
|               | Body part                                                                               | ‘Lumbar spine, sacro-iliac jIont or pelvis' |       |
|               | Subdiscipline                                                                           | ‘Musculoskeletal’                           |       |
|               | Published since                                                                         | 2005                                        |       |
| File          | 2021.07.06 - Sinergias CORE_PEDro_30.doc<br>2021.07.06 - Sinergias CORE_PEDro_30.ris    |                                             |       |

## Section S2. Studies included after full reading and data extraction (n=15)

**Table S2.** Studies included in the systematic review after full reading and data extraction (n=15).

| Author/year    | Title                                                                                                                         | Desing                                          | N                                                       | Intervention                                               | Comparator                                                                 | US                      | Aims                                                                                                                                                                                                                      | Synergy     | Results                                     |
|----------------|-------------------------------------------------------------------------------------------------------------------------------|-------------------------------------------------|---------------------------------------------------------|------------------------------------------------------------|----------------------------------------------------------------------------|-------------------------|---------------------------------------------------------------------------------------------------------------------------------------------------------------------------------------------------------------------------|-------------|---------------------------------------------|
| ShahAli S,2019 | Ultrasound measurement of abdominal muscles during clinical isometric endurance tests in women with and without low back pain | Observational (Case- control)                   | (n=20)<br>chronic<br>NSLBP<br>and<br>healthy<br>(women) | (n=10)<br>Isometric trunk lift<br>contraction in<br>supine | (n=10)<br>Bilateral trunk lift<br>manoeuvre of<br>the lower<br>extremities | US.<br>B Mode.          | To determine the differences in muscle thickness changes during two manoeuvres. The second objective was to measure the degree of muscle activity of the deep muscles (TRA, IO) compared to the superficial muscles (EO). | TRA, IO,EO  | Thickness<br>(cm)                           |
| Bialy M, 2019  | Deformations of abdominal muscles under experimentally induced LBP                                                            | Observational cross-sectional<br>(case-control) | (n=42)<br>Induce<br>LBP and<br>healthy                  | Mechanical disturbance +<br>induced LBP                    | Mechanical disturbance                                                     | US<br>M mode<br>and TDI | To investigate TDI changes during activation of lateral abdominal muscles under experimentally induced pain.                                                                                                              | TRA, IO,EO  | Strain rate<br>(ms)                         |
| Yoon B,2018    | The relation between abdominal muscle asymmetry and trunk postural stability: An ultrasound imaging study.                    | Observational<br>(Cross-sectional case-series)  | (n=18)<br>Healthy<br>(men)                              | Mechanical stimulation                                     | No<br>comparator                                                           | US.<br>B mode.          | Compares the muscle thickness between right and left side after a disruptive movement .                                                                                                                                   | TRA, IO,EO, | Thickness<br>(cm), %<br>change<br>thickness |

|                     |                                                                                                                  |                                              |                                  |                                                                      |                           |                     |                                                                                                                                                                                                                        |                 |                                 |
|---------------------|------------------------------------------------------------------------------------------------------------------|----------------------------------------------|----------------------------------|----------------------------------------------------------------------|---------------------------|---------------------|------------------------------------------------------------------------------------------------------------------------------------------------------------------------------------------------------------------------|-----------------|---------------------------------|
| Puentedura EJ, 2017 | Immediate Changes in Resting and Contracted Thickness of TRA After DN of LM in Healthy Participants.             | RCT                                          | (n=47) Healthy                   | (n=22) DN in LM                                                      | (n=25) DN + Placebo in LM | US. B Mode          | To analyse changes in TRA thickness at rest and at maximum concentric contraction after DN of the LM in subjects without LBP.                                                                                          | TRA y LM        | CSA of ML and TRA. DN in the LM |
| Tahan N, 2016       | Measurement of superficial and deep abdominal muscle thickness: an ultrasonography study                         | Observational (cross-sectional case series)  | (n=156) Healthy                  | No intervention                                                      | No comparator             | RUSI                | To determine the thickness and symmetry of the abdominal wall muscles at rest in the Iranian population and to investigate associations with demographic factors (sex, age, BMI...) in order to find reference values. | RA, TRA, IO, EO | Thickness (cm)                  |
| Hoseinpoor TS, 2013 | A Comparison of Abdominal Muscle Thickness Changes After a Lifting Task in Subjects with and Without Chronic LBP | Observational (cross-sectional case control) | (n=28) Chronic NSLBP and Healthy | No intervention                                                      | No comparator             | US. B Mode          | To compare the effect of standing back extensor muscle fatigue on abdominal muscle recruitment with and without axial loading, in subjects with and without LBP                                                        | TRA, IO,EO, LM  | % change thickness              |
| Dafkou K, 2013      | The Effect of Additional External Resistance on Inter-Set Changes in Abdominal Muscle                            | Observational (cross-sectional case series)  | (n=20) Healthy                   | 8 different exercise conditions during the pelvic bridging position. | No comparator             | US. B Mode and TDI. | Identify any differences in the thickness of the abdominal muscles through a series of exercises with an extra load.                                                                                                   | RA, TRA         | % change thickness              |

Thickness during  
Bridging Exercise

|                     |                                                                                                                    |                                             |                      |                                     |               |            |                                                                                                                                                                                                                                               |              |                |
|---------------------|--------------------------------------------------------------------------------------------------------------------|---------------------------------------------|----------------------|-------------------------------------|---------------|------------|-----------------------------------------------------------------------------------------------------------------------------------------------------------------------------------------------------------------------------------------------|--------------|----------------|
| Seo D-K,2013        | The Relationship of Abdominal Muscles Balance and Body Balance                                                     | Observational (cross-sectional case series) | (n=41) Healthy       | ADIM                                | No comparator | US. B Mode | To identify the impact on the differences in TRA, IO and EO muscle thickness between left and right sides when performing ADIM.                                                                                                               | TRA, IO,EO   | Thickness (cm) |
| Lee D-Y et al, 2012 | A Comparison of Abdominal Muscle Thicknesses Measured by US between the ADIM and ASRL Maneuvers                    | Observational (cross-sectional case series) | (n=37) Healthy       | ASRL, ADIM                          | No comparator | US         | To compare and analyse muscle thickness, via RUSI the muscle thickness of the TRA, IO and EO in an ADIM manoeuvre and ASRL, to determine if they are clinically valid functional tests for diagnosis/measurement with sonographic procedures. | TRA, IO y EO | Thickness (cm) |
| Westad C, 2010      | Location and sequence of muscle onset in deep abdominal muscles measured by different modes of ultrasound imaging. | Observational (cross-sectional case series) | (n=24) chronic NSLBP | Elevation of the contralateral arm. | No comparator | US. B Mode | Determine the differences in activation time after a fast arm lift manoeuvre. And determine if it is reliable.                                                                                                                                | TRA, IO,EO   | Time (ms)      |

|                  |                                                                                                                                       |                                                     |                    |                         |                   |                          |                                                                                                                                                                                             |                                                    |                                                              |
|------------------|---------------------------------------------------------------------------------------------------------------------------------------|-----------------------------------------------------|--------------------|-------------------------|-------------------|--------------------------|---------------------------------------------------------------------------------------------------------------------------------------------------------------------------------------------|----------------------------------------------------|--------------------------------------------------------------|
| Teyhen DS, 2009  | Ultrasound<br>Characteristics of<br>the Deep<br>Abdominal<br>Muscles During the<br>ASRL.                                              | Observational<br>(cross-sectional case<br>control)  | (n=30)             | (n=15) Chronic<br>NSLBP | (n=15)<br>Healthy | US.<br>B Mode            | To determine changes in TrA and<br>IO thickness and symmetry with<br>the ASRL manoeuvre in subjects<br>with and without LBP                                                                 | TRA, IO                                            | % change<br>thickness                                        |
| Hides JA, 2009   | Altered response of<br>the anterolateral<br>abdominal muscles<br>to simulated<br>weight-bearing in<br>subjects with low<br>back pain  | Observational<br>(Cross-sectional case-<br>control) | (n=39)             | (n=19)<br>chronic NSLBP | (n=20)<br>Healthy | US.<br>B Mode            | To compare the automatic<br>recruitment of abdominal muscles<br>between subjects with and<br>without LBP in response to the<br>simulated weight bearing task.                               | TrA, IO,<br>anterior<br>abdominal<br>fascia of TrA | % change<br>thickness                                        |
| Mannion AF, 2008 | Abdominal muscle<br>size and symmetry<br>at rest and during<br>abdominal<br>hollowing<br>exercises in<br>healthy control<br>subjects. | Observational<br>(cross-sectional case<br>series)   | (n=57)<br>Healthy  | ADIM                    | No<br>comparator  | US.<br>B mode, M<br>mode | Asymmetry between homo and<br>contralateral sides.<br><br>Comparison by sex and at<br>rest/ADIM manoeuvre of TRA, IO<br>and EO muscle thickness.                                            | TRA, IO,EO                                         | Absolute<br>difference<br>between<br>right and left<br>side. |
| Rankin G,2006    | Abdominal muscle<br>size and symmetry<br>in normal subjects.                                                                          | Observational<br>(cross-sectional case<br>series)   | (n=123)<br>Healthy | No<br>intervention      | No<br>comparator  | RUSI                     | To provide reference ranges of<br>absolute and relative size and<br>symmetry of healthy abdominal<br>muscles. To examine the<br>relationship between muscle size<br>and anthropology and to | RA, TRA, IO,<br>EO                                 | Thickness<br>(muscle<br>pattern)                             |

investigate the homogeneity  
IO,EO and TRA thickness.

|                    |                                                                              |     |                            |                                                    |                                   |      |                                                                                                                                                                                                            |             |                    |
|--------------------|------------------------------------------------------------------------------|-----|----------------------------|----------------------------------------------------|-----------------------------------|------|------------------------------------------------------------------------------------------------------------------------------------------------------------------------------------------------------------|-------------|--------------------|
| Teyhen DS,<br>2005 | The use of<br>ultrasound<br>imaging of the<br>ADIM in subjetscts<br>with LBP | RCT | (n=28)<br>Chronic<br>NSLBP | (n=13)<br>Traditional<br>exercise +<br>Biofeedback | (n=15)<br>Traditional<br>exercise | RUSI | To characterise the extent to<br>which the ADIM manoeuvre<br>results in preferential activation of<br>the TRA. To determine whether<br>RUSI improves participants'<br>ADIM performance and<br>reliability. | TRA (IO+EO) | Thickness<br>(cm). |
|--------------------|------------------------------------------------------------------------------|-----|----------------------------|----------------------------------------------------|-----------------------------------|------|------------------------------------------------------------------------------------------------------------------------------------------------------------------------------------------------------------|-------------|--------------------|

*\*Nonspecific Low back Pain: NSLBP; Ultrasound: US; Brightness mode: B Mode; Motion Mode: M mode; Transversus abdominis: TRA; Internal Oblique:IO; External Oblique: EO; Centimetres: cm; milliseconds: ms; percentage change in thickness: % change thickness; Low Back Pain: LBP; Tissular Deformation Index: TDI; Randomized Clinical Trials: RCT; Dry Needling: DN; Lumbar Multifidus: LM; Cross Sectional Area: CSA; Rehabilitative Ultrasound Imaging: RUSI; Rectus abdominis: RA; Body Mass Index: BMI; Abdominal Drowing In Maneouver: ADIM; Active Straight Leg Raise: ASRL.*

| Section and Topic   | Item # | Checklist item                               | Location where item is reported |
|---------------------|--------|----------------------------------------------|---------------------------------|
| <b>TITLE</b>        |        |                                              |                                 |
| Title               | 1      | Identify the report as a systematic review.  | Page 1                          |
| <b>ABSTRACT</b>     |        |                                              |                                 |
| Abstract            | 2      | See the PRISMA 2020 for Abstracts checklist. | Page 1                          |
| <b>INTRODUCTION</b> |        |                                              |                                 |

| Section and Topic             | Item # | Checklist item                                                                                                                                                                                                                                                                                       | Location where item is reported                       |
|-------------------------------|--------|------------------------------------------------------------------------------------------------------------------------------------------------------------------------------------------------------------------------------------------------------------------------------------------------------|-------------------------------------------------------|
| Rationale                     | 3      | Describe the rationale for the review in the context of existing knowledge.                                                                                                                                                                                                                          | Pages 1-2                                             |
| Objectives                    | 4      | Provide an explicit statement of the objective(s) or question(s) the review addresses.                                                                                                                                                                                                               | Page 2                                                |
| <b>METHODS</b>                |        |                                                                                                                                                                                                                                                                                                      |                                                       |
| Eligibility criteria          | 5      | Specify the inclusion and exclusion criteria for the review and how studies were grouped for the syntheses.                                                                                                                                                                                          | Page 3                                                |
| Information sources           | 6      | Specify all databases, registers, websites, organisations, reference lists and other sources searched or consulted to identify studies. Specify the date when each source was last searched or consulted.                                                                                            | Page 3                                                |
| Search strategy               | 7      | Present the full search strategies for all databases, registers and websites, including any filters and limits used.                                                                                                                                                                                 | Page 3<br>Section S1.<br>Table S1.<br>Search Strategy |
| Selection process             | 8      | Specify the methods used to decide whether a study met the inclusion criteria of the review, including how many reviewers screened each record and each report retrieved, whether they worked independently, and if applicable, details of automation tools used in the process.                     | Page 3                                                |
| Data collection process       | 9      | Specify the methods used to collect data from reports, including how many reviewers collected data from each report, whether they worked independently, any processes for obtaining or confirming data from study investigators, and if applicable, details of automation tools used in the process. | Page 3                                                |
| Data items                    | 10a    | List and define all outcomes for which data were sought. Specify whether all results that were compatible with each outcome domain in each study were sought (e.g. for all measures, time points, analyses), and if not, the methods used to decide which results to collect.                        | Pages 3 -4                                            |
|                               | 10b    | List and define all other variables for which data were sought (e.g. participant and intervention characteristics, funding sources). Describe any assumptions made about any missing or unclear information.                                                                                         | Pages 3-4                                             |
| Study risk of bias assessment | 11     | Specify the methods used to assess risk of bias in the included studies, including details of the tool(s) used, how many reviewers assessed each study and whether they worked independently, and if applicable, details of automation tools used in the process.                                    | Page 4                                                |

| Section and Topic         | Item # | Checklist item                                                                                                                                                                                                                                              | Location where item is reported               |
|---------------------------|--------|-------------------------------------------------------------------------------------------------------------------------------------------------------------------------------------------------------------------------------------------------------------|-----------------------------------------------|
| Effect measures           | 12     | Specify for each outcome the effect measure(s) (e.g. risk ratio, mean difference) used in the synthesis or presentation of results.                                                                                                                         | Pages 3 -4                                    |
| Synthesis methods         | 13a    | Describe the processes used to decide which studies were eligible for each synthesis (e.g. tabulating the study intervention characteristics and comparing against the planned groups for each synthesis (item #5)).                                        | Page 3                                        |
|                           | 13b    | Describe any methods required to prepare the data for presentation or synthesis, such as handling of missing summary statistics, or data conversions.                                                                                                       | Page 3                                        |
|                           | 13c    | Describe any methods used to tabulate or visually display results of individual studies and syntheses.                                                                                                                                                      | Pages 5-8                                     |
|                           | 13d    | Describe any methods used to synthesize results and provide a rationale for the choice(s). If meta-analysis was performed, describe the model(s), method(s) to identify the presence and extent of statistical heterogeneity, and software package(s) used. | N/A                                           |
|                           | 13e    | Describe any methods used to explore possible causes of heterogeneity among study results (e.g. subgroup analysis, meta-regression).                                                                                                                        | N/A                                           |
|                           | 13f    | Describe any sensitivity analyses conducted to assess robustness of the synthesized results.                                                                                                                                                                | N/A                                           |
| Reporting bias assessment | 14     | Describe any methods used to assess risk of bias due to missing results in a synthesis (arising from reporting biases).                                                                                                                                     | N/A                                           |
| Certainty assessment      | 15     | Describe any methods used to assess certainty (or confidence) in the body of evidence for an outcome.                                                                                                                                                       | N/A                                           |
| <b>RESULTS</b>            |        |                                                                                                                                                                                                                                                             |                                               |
| Study selection           | 16a    | Describe the results of the search and selection process, from the number of records identified in the search to the number of studies included in the review, ideally using a flow diagram.                                                                | Page 4                                        |
|                           | 16b    | Cite studies that might appear to meet the inclusion criteria, but which were excluded, and explain why they were excluded.                                                                                                                                 | Supplementary material. Section S3. Table S3. |
| Study                     | 17     | Cite each included study and present its characteristics.                                                                                                                                                                                                   | Supplementary                                 |

| Section and Topic             | Item # | Checklist item                                                                                                                                                                                                                                                                       | Location where item is reported                                                            |
|-------------------------------|--------|--------------------------------------------------------------------------------------------------------------------------------------------------------------------------------------------------------------------------------------------------------------------------------------|--------------------------------------------------------------------------------------------|
| characteristics               |        |                                                                                                                                                                                                                                                                                      | material.<br>Section S2.<br>Table S2.                                                      |
| Risk of bias in studies       | 18     | Present assessments of risk of bias for each included study.                                                                                                                                                                                                                         | Supplementary material.<br>Section S4.<br>Figure S1<br>Section S5.<br>Table S4<br>Table S5 |
| Results of individual studies | 19     | For all outcomes, present, for each study: (a) summary statistics for each group (where appropriate) and (b) an effect estimate and its precision (e.g. confidence/credible interval), ideally using structured tables or plots.                                                     | Pages 4-8                                                                                  |
| Results of syntheses          | 20a    | For each synthesis, briefly summarise the characteristics and risk of bias among contributing studies.                                                                                                                                                                               | Page 8                                                                                     |
|                               | 20b    | Present results of all statistical syntheses conducted. If meta-analysis was done, present for each the summary estimate and its precision (e.g. confidence/credible interval) and measures of statistical heterogeneity. If comparing groups, describe the direction of the effect. | N/A                                                                                        |
|                               | 20c    | Present results of all investigations of possible causes of heterogeneity among study results.                                                                                                                                                                                       | N/A                                                                                        |
|                               | 20d    | Present results of all sensitivity analyses conducted to assess the robustness of the synthesized results.                                                                                                                                                                           | N/A                                                                                        |
| Reporting biases              | 21     | Present assessments of risk of bias due to missing results (arising from reporting biases) for each synthesis assessed.                                                                                                                                                              | Page 8                                                                                     |
| Certainty of evidence         | 22     | Present assessments of certainty (or confidence) in the body of evidence for each outcome assessed.                                                                                                                                                                                  | N/A                                                                                        |
| <b>DISCUSSION</b>             |        |                                                                                                                                                                                                                                                                                      |                                                                                            |
| Discussion                    | 23a    | Provide a general interpretation of the results in the context of other evidence.                                                                                                                                                                                                    | Page 8-10                                                                                  |

| Section and Topic                              | Item # | Checklist item                                                                                                                                                                                                                             | Location where item is reported |
|------------------------------------------------|--------|--------------------------------------------------------------------------------------------------------------------------------------------------------------------------------------------------------------------------------------------|---------------------------------|
|                                                | 23b    | Discuss any limitations of the evidence included in the review.                                                                                                                                                                            | Page 10                         |
|                                                | 23c    | Discuss any limitations of the review processes used.                                                                                                                                                                                      | Page 10                         |
|                                                | 23d    | Discuss implications of the results for practice, policy, and future research.                                                                                                                                                             | Page 10                         |
| <b>OTHER INFORMATION</b>                       |        |                                                                                                                                                                                                                                            |                                 |
| Registration and protocol                      | 24a    | Provide registration information for the review, including register name and registration number, or state that the review was not registered.                                                                                             | Pages 2-3                       |
|                                                | 24b    | Indicate where the review protocol can be accessed, or state that a protocol was not prepared.                                                                                                                                             | Pages 2-3                       |
|                                                | 24c    | Describe and explain any amendments to information provided at registration or in the protocol.                                                                                                                                            | N/A                             |
| Support                                        | 25     | Describe sources of financial or non-financial support for the review, and the role of the funders or sponsors in the review.                                                                                                              | Page 10                         |
| Competing interests                            | 26     | Declare any competing interests of review authors.                                                                                                                                                                                         | Page 10                         |
| Availability of data, code and other materials | 27     | Report which of the following are publicly available and where they can be found: template data collection forms; data extracted from included studies; data used for all analyses; analytic code; any other materials used in the review. | Supplementary material          |

From: Page MJ, McKenzie JE, Bossuyt PM, Boutron I, Hoffmann TC, Mulrow CD, et al. The PRISMA 2020 statement: an updated guideline for reporting systematic reviews. BMJ 2021;372:n71. doi: 10.1136/bmj.n71

For more information, visit: <http://www.prisma-statement.org/>

---

### Section S3. Studies excluded after full reading and causes (n=50)

**Table S3.** Causes of exclusion of the excluded studies in the systematic review

| <b>1. Cause of exclusion: Measure several muscles before and after in isolation (n=38)</b> |                                                                                                                                                                                                                                 |
|--------------------------------------------------------------------------------------------|---------------------------------------------------------------------------------------------------------------------------------------------------------------------------------------------------------------------------------|
| <b>Author/year</b>                                                                         | <b>Article</b>                                                                                                                                                                                                                  |
| Akbari A, 2008                                                                             | The effect of motor control exercise versus general exercise on lumbar local stabilizing muscles thickness: randomized controlled trial of patients with chronic low back pain                                                  |
| Amerijckx C, 2020                                                                          | Influence of phase of respiratory cycle on ultrasound imaging of deep abdominal muscle thickness                                                                                                                                |
| Batibay S, 2020                                                                            | Effect of Pilates mat exercise and home exercise programs on pain, functional level, and core muscle thickness in women with chronic low back pain                                                                              |
| Beazell JR, 2011                                                                           | Changes in lateral abdominal muscle thickness during an abdominal drawing in Maneuver in individuals with and without low back pain                                                                                             |
| Cho M, 2015                                                                                | The effects of bridge exercise with the abdominal drawing-in maneuver on an unstable surface on the abdominal muscle thickness of healthy adults                                                                                |
| Debusse D, 2013                                                                            | Low impact weight-bearing exercise in an upright posture increases the activation of the two key local muscles on the lumbopelvic region.                                                                                       |
| Djordjevic O, 2015                                                                         | Relationship Between Electromyographic Signal Amplitude and Thickness Change of the Trunk Muscles in Patients with and Without Low Back Pain                                                                                    |
| Gala-Alarcon P, 2018                                                                       | Ultrasound Evaluation of the Abdominal Wall and Lumbar Multifidus Muscles in Participants Who Practice Pilates: A 1-year Follow-up Case Series                                                                                  |
| Gibbons, 2019                                                                              | Exercising on Different Unstable Surfaces Increases Core Abdominal Muscle Thickness: An Observational Study Using Real-Time Ultrasound                                                                                          |
| Gong W, 2016                                                                               | The effects of running in place in a limited area with abdominal drawing-in maneuvers on abdominal muscle thickness in chronic low back pain patients                                                                           |
| Gong W, 2015                                                                               | Effects of bridge exercises with a sling and vibrations on abdominal muscle thickness in healthy adults                                                                                                                         |
| Guthrie, 2012                                                                              | The effect of traditional bridging or suspension-exercise bridging on lateral abdominal thickness in individuals with low back pain                                                                                             |
| Halliday MH, 2019                                                                          | A randomized clinical trial comparing the McKenzie method and motor control exercises in people with chronic low backpain and a directional preference: 1 year follow-up                                                        |
| Huang Q, 2014                                                                              | Comparison of the Efficacy of Different Long-term Interventions on Chronic Low Back Pain Using the Cross-sectional Area of the Multifidus Muscle and the Thickness of the Transversus Abdominis Muscle as Evaluation Indicators |
| Kiesel KB, 2007                                                                            | A Comparison of Select Trunk Muscle Thickness Change Between Subjects With Low Back Pain Classified in the Treatment-Based Classification System and Asymptomatic Controls                                                      |
| Kiesel KB, 2008                                                                            | Rehabilitative ultrasound measurement of select trunk muscle activation during induced pain                                                                                                                                     |
| Kim H, 2008                                                                                | Effect of whole body horizontal vibration exercise in chronic low back pain patients: Vertical versus horizontal vibration exercise                                                                                             |
| Kim HI, 2012                                                                               | Comparison of Changes in Abdominal Muscle Thickness Using Ultrasound Imaging during the Abdominal Drawing-in Maneuver Performed by Patients with Low Back Pain and Healthy Subjects                                             |

---

|                    |                                                                                                                                                                                            |
|--------------------|--------------------------------------------------------------------------------------------------------------------------------------------------------------------------------------------|
| Kim J-S,2018       | Abdominal draw-in maneuver combined with simulated weight bearing increases transversus abdominis and internal oblique thickness                                                           |
| Kong Y-S,2015      | The effects of prone bridge exercise on trunk muscle thickness in chronic low back pain patients                                                                                           |
| Koppenhaver ,2011  | SL Association Between Changes in Abdominal and Lumbar Multifidus Muscle Thickness and Clinical Improvement After Spinal Manipulation                                                      |
| Lariviere C,2019   | Ultrasound Measures of the Abdominal Wall in Patients with Low Back Pain Before and After an 8-week Lumbar Stabilization Exercise Program, and Their Association With Clinical Outcomes    |
| Lee J-Y,2018       | The effect of therapeutic abdominal drawing-in maneuver using ultrasonography on lateral abdominal muscle thickness and balance                                                            |
| Lee K,2017         | Comparison of lateral abdominal muscle thickness during bridge exercises with different support surfaces in healthy individuals                                                            |
| Lee SH,2014        | The effect of abdominal bracing in combination with low extremity movements on changes in thickness of abdominal muscles and lumbar strength for low back pain                             |
| Madokoro S, 2020l  | Effect of the Abdominal Draw-In Maneuver and Bracing on Abdominal Muscle Thickness and the Associated Subjective Difficulty in Healthy Individuals                                         |
| Mew R,2009         | Comparison of changes in abdominal muscle thickness between standing and crook lying during active abdominal hollowing using ultrasound imaging                                            |
| Nabavi N, 2018     | The Effect of 2 Different Exercise Programs on Pain Intensity and Muscle Dimensions in Patients with Chronic Low Back Pain: A Randomized Controlled Trial                                  |
| Nagai H, 2016      | Deep abdominal muscle thickness measured under sitting conditions during different stability tasks                                                                                         |
| Pinto RZ, 2011     | The effect of lumbar posture on abdominal muscle thickness during an isometric leg task in people with and without non-specific low back pain                                              |
| Rasouli O,2020     | The Effect of Respiratory Phase on Abdominal Muscle Activity During Stable and Unstable Sitting Positions in Individuals with and Without Chronic Low Back Pain                            |
| Sugaya T, 2014     | Ultrasound Evaluation of Muscle Thickness Changes in the External Oblique, Internal Oblique, and Transversus Abdominis Muscles Considering the Influence of Posture and Muscle Contraction |
| Sutherlin MA, 2018 | Changes in Muscle Thickness Across Positions on Ultrasound Imaging in Participants with or Without a History of Low Back Pain                                                              |
| Teyhen Ds, 2008    | Changes in Deep Abdominal Muscle Thickness During Common Trunk-Strengthening Exercises Using Ultrasound Imaging                                                                            |
| Vasseljen O, 2010  | Abdominal muscle contraction thickness and function after specific and general exercises: A randomized controlled trial in chronic low back pain patients                                  |
| Winnard A, 2017    | Movement amplitude on the Functional Re-adaptive Exercise Device: deep spinal muscle activity and movement control                                                                         |
| Yang H-S, 2013     | Changes in the Thickness of Trunk Stabilizer Muscles According to Increased Lifting Loads in Stoop Lifting                                                                                 |
| Yang H-S,2018      | Difference of the thickness and activation of trunk muscles during static stoop lift at different loads between subjects with and without low back pain                                    |

## 2. Cause of exclusion: Other population (n=3)

| Author/year | Article |
|-------------|---------|
|-------------|---------|

|               |                                                                                                                                                                                       |
|---------------|---------------------------------------------------------------------------------------------------------------------------------------------------------------------------------------|
| Cai C, 2015   | Low Back and Lower-Limb Muscle Performance in Male and Female Recreational Runners with Chronic Low Back Pain                                                                         |
| Ehsani, 2020  | Stabilization exercise affects function of transverse abdominis and pelvic floor muscles in women with postpartum lumbo-pelvic pain: a double-blinded randomized clinical trial study |
| Stuge B, 2006 | Abdominal and pelvic floor muscle function in women with and without long lasting pelvic girdle pain                                                                                  |

### 3. Cause of exclusion: Another objective (n=2)

| Author/year   | Article                                                                                                                                                     |
|---------------|-------------------------------------------------------------------------------------------------------------------------------------------------------------|
| Tahan N, 2013 | Relationship between ultrasonography and electromyography measurement of abdominal muscles when activated with and without pelvic floor muscles contraction |
| Tahan N, 2014 | Reliability of the ultrasound measurements of abdominal muscles activity when activated with and without pelvic floor muscles contraction                   |

### 4. Cause of exclusion: Other type of relationship established with US (n=5)

| Author/year        | Article                                                                                                                                                                               |
|--------------------|---------------------------------------------------------------------------------------------------------------------------------------------------------------------------------------|
| Hebert JJ, 2010    | The Relationship of Transversus Abdominis and Lumbar Multifidus Activation and Prognostic Factors for Clinical Success with a Stabilization Exercise Program: A Cross-Sectional Study |
| Ota M, 2011        | Differences in Abdominal Muscle Thicknesses between Chronic Low Back Pain Patients and Healthy Subjects                                                                               |
| Sutherlin MA, 2019 | Correlations Between Anthropometric Measures and Muscle Thickness Using Ultrasound Imaging                                                                                            |
| Teyhen DS, 2012    | Abdominal and Lumbar Multifidus Muscle Size and Symmetry at Rest and During Contracted States Normative Reference Ranges                                                              |
| Whittaker JL, 2013 | Comparison of the Sonographic Features of the Abdominal Wall Muscles and Connective Tissues in Individuals with and Without Lumbopelvic Pain                                          |

### 5. Cause of exclusion: Results for one muscle only (n=2)

| Author/year             | Article                                                                                                                                                                      |
|-------------------------|------------------------------------------------------------------------------------------------------------------------------------------------------------------------------|
| Unsgaard-Tondel M, 2012 | Is activation of transversus abdominis and obliquus internus abdominis associated with long-term changes in chronic low back pain? A prospective study with 1-year follow-up |
| Vasseljen O, 2012       | Effect of core stability exercises on feed-forward activation of deep abdominal muscles in chronic low back pain: A randomized controlled trial                              |

## Section S4. Quality of the studies included for RCT

**Figure S1.** Risk of bias Tool (RoB 2.0)

RCTs (n=2).

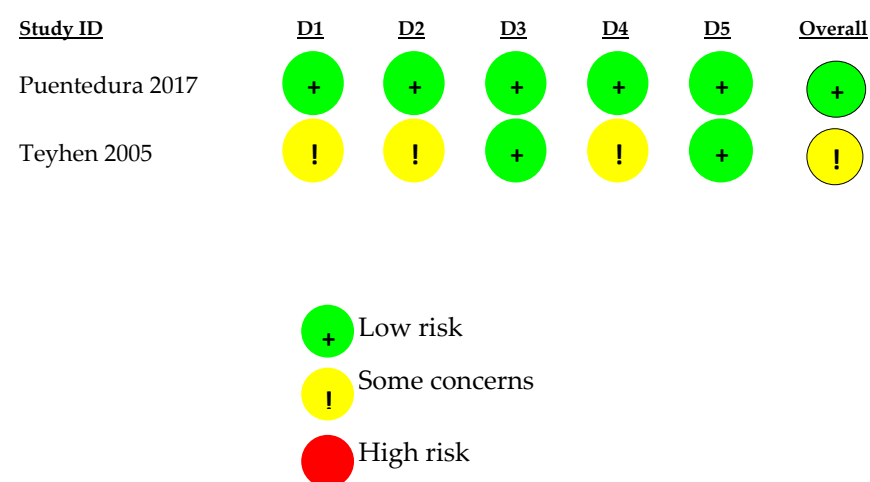

## Section S5. Quality of the studies included for Observational studies

**Table S4.** JBI Critical Appraisal Checklist for case control studies. Obsevatinal (Case-control studies) (n=5).

| <b>JBI CRITICAL APPRAISAL CHECKLIST<br/>FOR CASE CONTROL STUDIES</b>                                             | Hides<br>2009 | Hosseinpoor<br>2015 | ShahAli<br>2018 | Teyhen<br>2009 | Bialy<br>2019 |
|------------------------------------------------------------------------------------------------------------------|---------------|---------------------|-----------------|----------------|---------------|
| 1. Were the groups comparable other than the presence of disease in cases or the absence of disease in controls? | Y             | Y                   | Unclear         | Y              | Y             |
| 2. Were cases and controls matched appropriately?                                                                | Y             | Y                   | Y               | Y              | Y             |
| 3. Were the same criteria used for identification of cases and controls?                                         | Y             | Y                   | N               | Y              | Y             |
| 4. Was exposure measured in a standard, valid and reliable way?                                                  | Y             | Y                   | Y               | Unclear        | Y             |
| 5. Was exposure measured in the same way for cases and controls?                                                 | Y             | Y                   | Y               | Y              | Y             |
| 6. Were confounding factors identified?                                                                          | N             | N                   | Unclear         | N              | N             |
| 7. Were strategies to deal with confounding factors stated?                                                      | N             | Unclear             | Unclear         | Unclear        | Unclear       |



|                                                   |                                                                                                   |   |   |   |   |   |   |   |
|---------------------------------------------------|---------------------------------------------------------------------------------------------------|---|---|---|---|---|---|---|
| 10.                                               | Were relevant outcome measures established a priori?                                              | Y | Y | Y | Y | Y | Y | Y |
| 11.                                               | Were outcome assessors blinded to the intervention that patients received?                        | N | N | N | U | N | U | U |
| 12.                                               | Were the relevant outcomes measured using appropriate objective/subjective methods?               | Y | Y | Y | Y | Y | Y | Y |
| 13.                                               | Were the relevant outcome measures made before and after the intervention?                        | Y | Y | Y | Y | Y | Y | Y |
| <b>Statistical analysis</b>                       |                                                                                                   |   |   |   |   |   |   |   |
| 14.                                               | Were the statistical tests used to assess the relevant outcomes appropriate?                      | Y | Y | Y | Y | Y | Y | Y |
| <b>Results and conclusions</b>                    |                                                                                                   |   |   |   |   |   |   |   |
| 15.                                               | Was follow-up long enough for important events and outcomes to occur?                             | U | U | Y | U | U | U | U |
| 16.                                               | Were losses to follow-up reported?                                                                | N | N | N | N | U | U | N |
| 17.                                               | Did the study provided estimates of random variability in the data analysis of relevant outcomes? | Y | Y | Y | Y | Y | Y | Y |
| 18.                                               | Were the adverse events reported?                                                                 | N | N | N | N | N | N | Y |
| 19.                                               | Were the conclusions of the study supported by results?                                           | Y | Y | Y | Y | Y | Y | N |
| <b>Competing interests and sources of support</b> |                                                                                                   |   |   |   |   |   |   |   |
| 20.                                               | Were both competing interests and sources of support for the study reported?                      | Y | Y | Y | Y | Y | Y | Y |

- **Y:** Yes
- **N:** No
- **P:** Partial
- **U:** Unclear
